# Supplementary material for: Endoplasmic reticulum calnexins participate in the primary root growth response to phosphate deficiency
Source: bioRxiv or medRxiv preprint supplement (doi:10.1101/2022.11.01.514754), 2022-11-02
Supplement: Supplementary file [file media-1.pdf]

**A**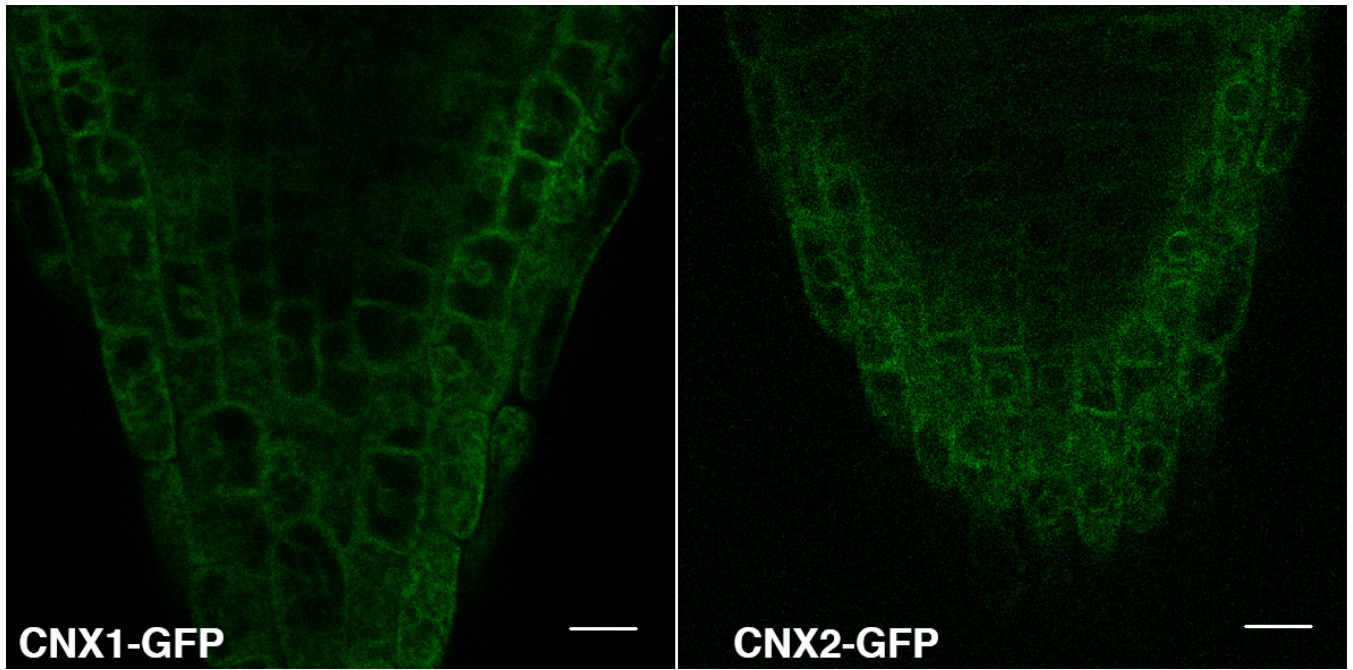**B**

GFP channel

RFP channel

Merge

CNX1-GFP  
ER-RFP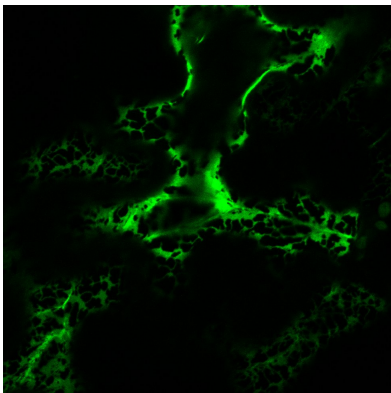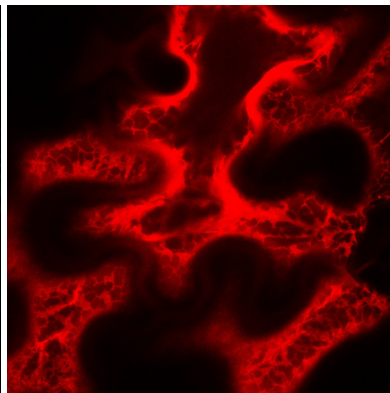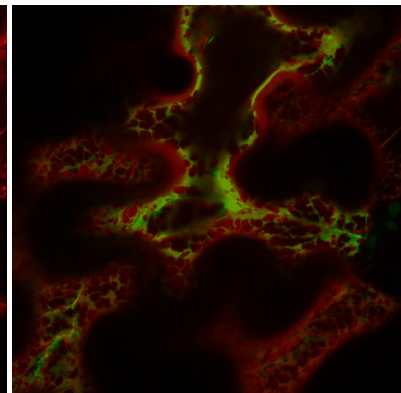CNX2-GFP  
ER-RFP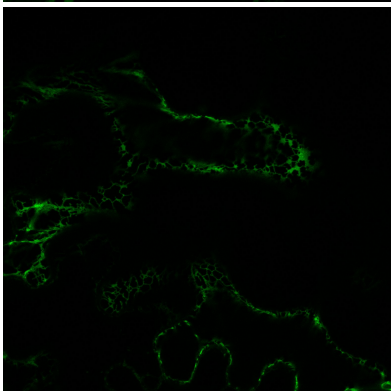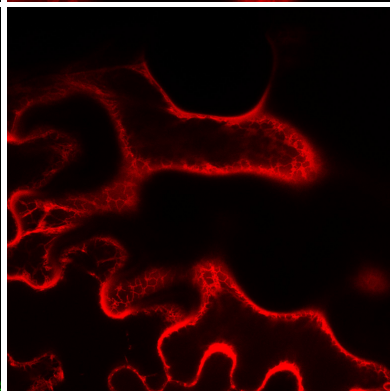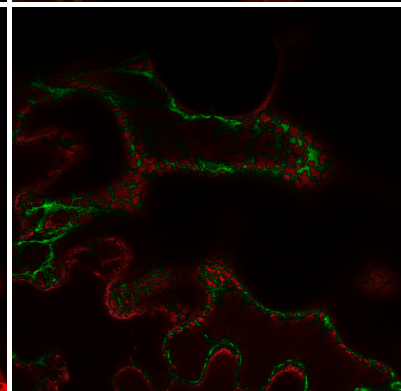

**Figure S1. Localization of *CNX1::CNX1-GFP* and *CNX2::CNX2-GFP* in the ER. (A)** Expression of *CNX1::CNX1-GFP* and *CNX2::CNX2-GFP* in roots tips of transgenic *cnx1-1 cnx2-2* plants. Bars = 10  $\mu$ m. **(B)** Transient co-expression of *CaMV35S::CNX1-GFP* and *CaMV35S::CNX2-GFP* with the ER marker ER-RFP in tobacco leaves.

Supplemental Table S1. List of mutants used in this work

| Mutant                | Gene code            | Source                   | Function                                     | Source                                             |
|-----------------------|----------------------|--------------------------|----------------------------------------------|----------------------------------------------------|
| <i>cnx1-1</i>         | AT5G61790            | SALK_083600              | Calnexin 1                                   | this work                                          |
| <i>cnx2-2</i>         | AT5G07340            | SAIL_865_F08             | Calnexin 2                                   | this work                                          |
| <i>cnx2-3</i>         | AT5G07340            | SAIL_580_F02             | Calnexin 2                                   | this work                                          |
| <i>crt1-1 crt2-1</i>  | AT1G56340, AT1G09210 | SALK_142821 SALK_099778  | Calreticulin 1, Calreticulin 2               | this work                                          |
| <i>crt3-1</i>         | AT1G08450            | SALK_051336              | Calreticulin 3                               | this work                                          |
| <i>alg3-1</i>         | AT2G47760            | SALK_064006              | ER $\alpha$ -1,3-mannosyltransferase         | Veit et al., Front Plant Sci 9, 1807 (2018)        |
| <i>alg3a</i>          | AT1G16900            | GABI_831D07              | ER $\alpha$ -1,2-mannosyltransferase         | Veit et al., Front Plant Sci 9, 1807 (2018)        |
| <i>alg10-1</i>        | AT5gG02410           | SAIL_515_F10             | ER $\alpha$ -1,2-glucosyltransferase         | Farid et al., Plant J 68, 314 (2011)               |
| <i>stt3a-2</i>        | AT5G19690            | SALK_058814              | Oligosaccharyl transferase                   | Koiwa et al., Plant Cell 15, 2273 (2003)           |
| <i>mns4 mns5</i>      | AT5G43710, AT1G25720 | SALK_119093, GT_5_84786  | ER-a-mannosidase-like                        | Hüttner et al., Plant Cell 26(4), 1712 (2014).     |
| <i>ebs1-6/uggt1-1</i> | AT1G71220            | WiscDsLox413-416K21      | UDP-glucose:glycoprotein glucosyltransferase | Jin et al., Mol Cell 26, 821 (2007)                |
| <i>psl4</i>           | AT5g56360            | SALK_074006              | Beta-subunit of glucosidase II               | this work                                          |
| <i>bib1-4 bip3-1</i>  | AT5G28540, AT1G09080 | CS856879 SALK_024133     | ER chaperone                                 | Maruyama et al., Plant Cell Physiol 55, 801 (2014) |
| <i>bip2-1 bip3-1</i>  | AT5G42020, AT1G09080 | CS842467 SALK_024133     | ER chaperone                                 | Maruyama et al., Plant Cell Physiol 55, 801 (2014) |
| <i>sdj2-1</i>         | AT2G25110            | T-DNA activation-tagging | complex with ERdj3B-BiP ER chaperones        | Nekrasov et al., EMBO J 28, 3428 (2009)            |
| <i>pdr2</i>           | AT5G23630            | EMS mutant               | P-type ATPase                                | Ticconi et al., Plant J 37, 801 (2004)             |
| <i>lpr1-1</i>         | AT1G23010            | SALK_016297              | Ferroxidase                                  | Svistoonoff et al., Nature Genet 39, 792 (2007)    |
| <i>lpr2-1</i>         | AT1G71040            | SALK_091930              | Ferroxidase                                  | Svistoonoff et al., Nature Genet 39, 792 (2007)    |
| <i>lpr1-1 lpr2-1</i>  | AT1G23010, AT1G71040 | SALK_016297, SALK_091930 | Ferroxidase                                  | Svistoonoff et al., Nature Genet 39, 792 (2007)    |

Supplementary Table S2. Primer list

| Gene ID   | Gene name | Primer name  | Sequence 5' - 3'       |
|-----------|-----------|--------------|------------------------|
| At5g61790 | CNX1      | qCNX1 Fw     | CGCTGGATCGTTTCGAAGAA   |
|           |           | qCNX1 Rv     | CACACTCAAGTCCTTCCTGGAA |
| At5g07340 | CNX2      | qCNX2 Fw2    | AGTTCCTCCTTCTGTTCCG    |
|           |           | qCNX2 Rv2    | AGGAATCAACGGAGGCTCAA   |
| At2G38940 | PHT1,4    | qPHT1,4 Fw   | TTGCTCCTAATTTTCTGATGCT |
|           |           | qPHT1,4 Rv   | TGTGCCGGCCGAAATCT      |
| At2G11810 | MGD3      | MGD3 qPCR Fw | AGAGGCCGGTTTAATGGAG    |
|           |           | MGD3 qPCR Rv | CATCAGAGGATGCACGCTA    |
| At1g42990 | bZIP60    | qbZIP60 Fw   | CCGGCGGAGGATTTTCTTCA   |
|           |           | qbZIP60 Rv   | GCCAAATCAACGGAGCCAGA   |
